# Supplementary material for: The risk of secondary sex ratio imbalance and increased monozygotic twinning after blastocyst transfer: data from the Japan Environment and Children’s Study
Source: Springer Nature journal article supplement (doi:10.1186/s12958-019-0471-1), 2019-02-22

**Figure 1**

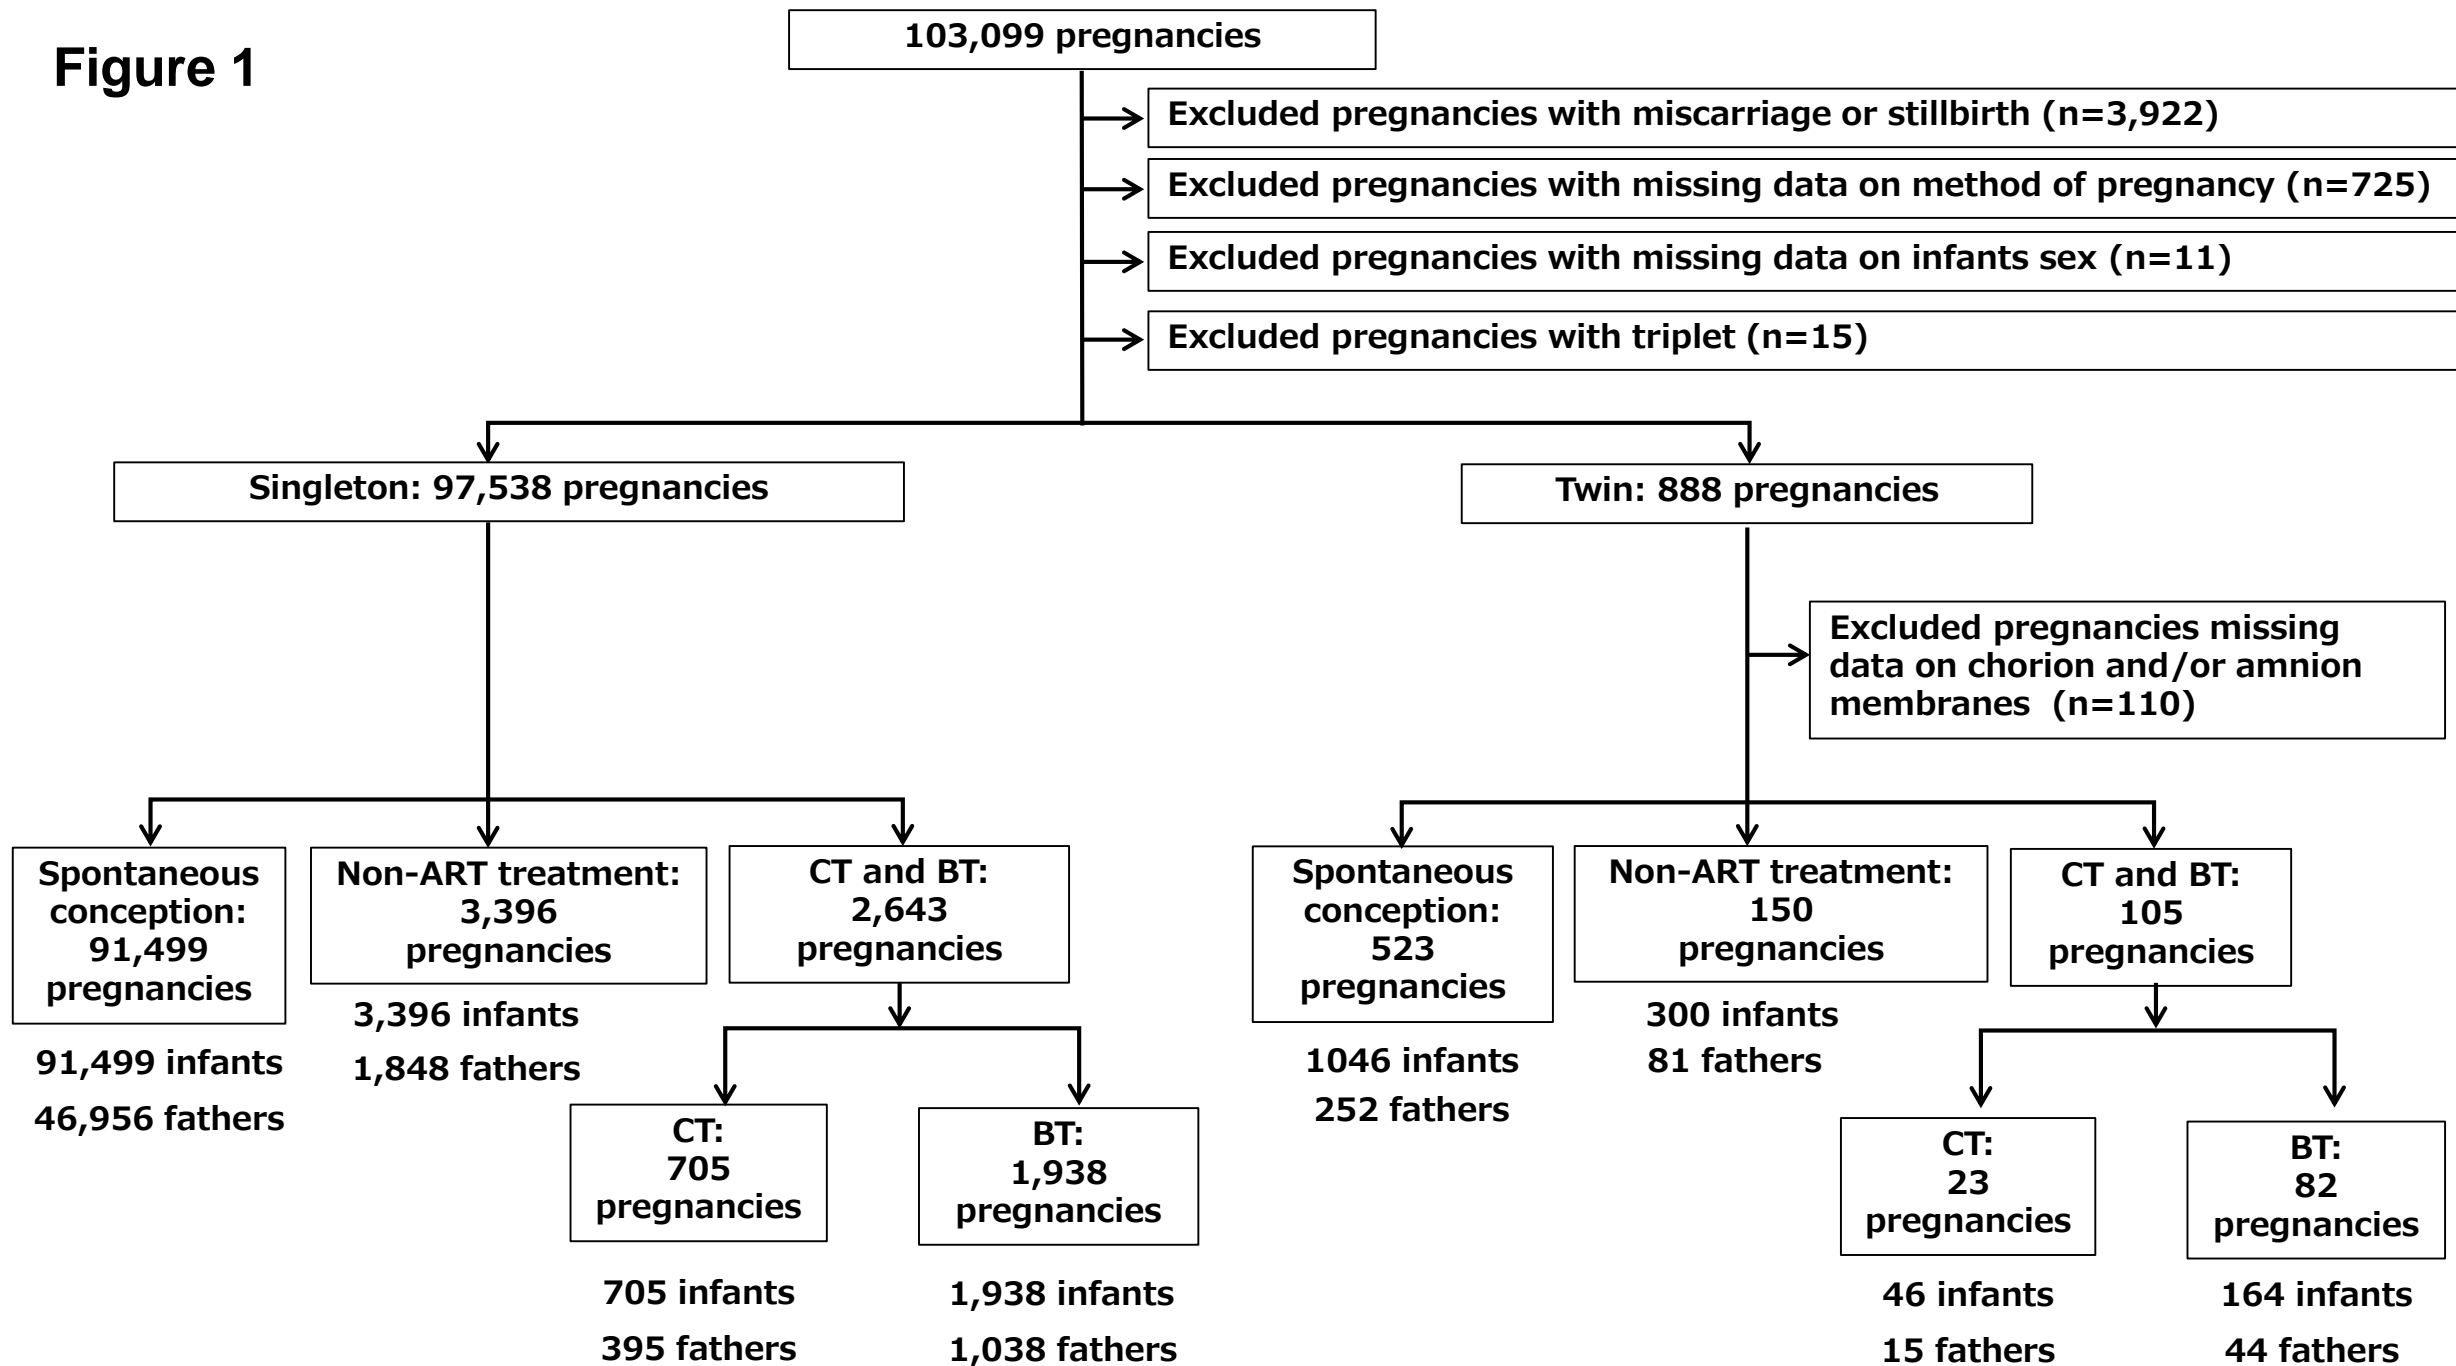

Supplement: MOESM1 [file 16501482]
